# Supplementary material
Source: PubMed Central journal article supplement (PMC5110392)
Supplement: NIHMS803541-supplement-Supplemental_Data_File___doc___tif__pdf__etc___1.pdf [file NIHMS803541-supplement-Supplemental_Data_File___doc___tif__pdf__etc___1.pdf]

**Appendix 1:** Flow of participants through the Look AHEAD study

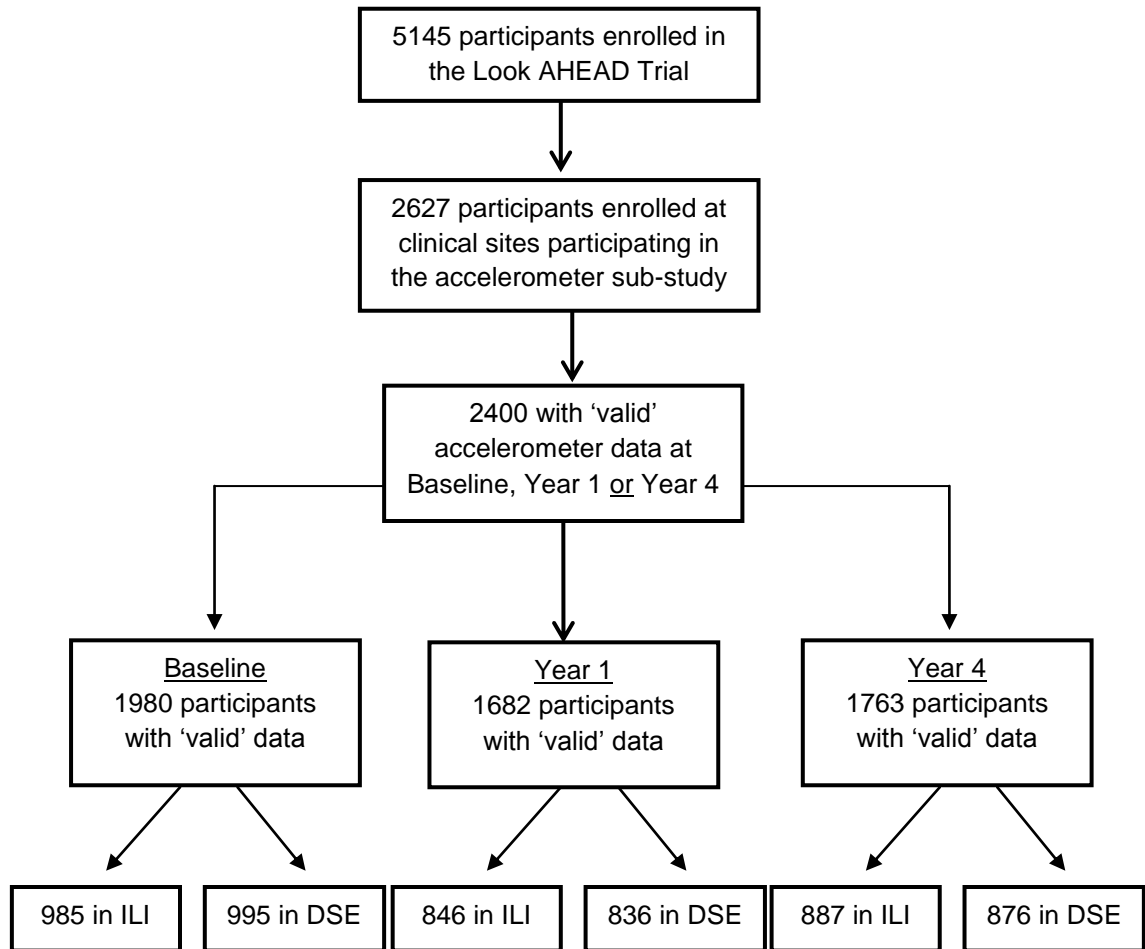

\*Participants at sites participating in the accelerometer sub-study who were not included in the analyses were excluded for the following reasons: equipment failure, participant refusal, time/scheduling conflicts, not asked to participate, insufficient wear time, underwent gastric bypass surgery
